# Supplementary material for: Comparing Efficacy and Safety of Endovascular Thrombectomy Versus Best Medical Management in Acute Isolated Posterior Cerebral Artery Occlusion Stroke: A Systematic Review and Meta-analysis
Source: Research Square preprint supplement (doi:10.21203/rs.3.rs-7312011/v1), 2025-09-23
Supplement: Supplementary file 1 [file 055efd216588d61fbe0a3a5e.docx]

**Supplementary File**

**Index**

**Supplementary Table 1:** Detailed search strategies used in different electronic databases

**Supplementary Table 2:** Newcastle Ottawa Scale for the quality assessment of the non-randomized cohort studies

**Supplementary Table S3:** Newcastle Ottawa Scale for the quality assessment of the non-randomized case-control studies

**Supplementary Figure 1:** Visual field normalization leave-out-out sensitivity analysis

**Supplementary Figure 2:** Good functional outcome leave-out-out sensitivity analysis

**Supplementary Figure 3:** Early neurological improvement funnel plot

**Supplementary Figure 4:** Visual field normalization funnel plot

**Supplementary Figure 5:** Good functional outcome funnel plot

**Supplementary Figure 6:** Excellent functional outcome funnel plot

**Supplementary Figure 7:** Symptomatic intracranial hemorrhage funnel plot

**Supplementary Figure 8:** Mortality at 90 days funnel plot

**Supplementary Figure 9:** Early neurological improvement, Egger's regression test

**Supplementary Figure 10:** Visual field normalization, Egger's regression test

**Supplementary Figure 11:** Good functional outcome, Egger's regression test

**Supplementary Figure 12:** Excellent functional outcome, Egger's regression test

**Supplementary Figure 13:** Mortality at 90 days, Egger's regression test

**Supplementary Figure 14:** Symptomatic intracranial hemorrhage, Egger's regression test

**Supplementary Figure 15:** Symptomatic intracranial hemorrhage, Begg's rank correlation test

| **Supplementary Table 1:** Detailed search strategies used in different electronic databases | | |
| --- | --- | --- |
| **Databases** | **Search string** | **Articles retrieved** |
| **PubMed** | ("Ischemic Stroke"[MeSH Terms] OR "Cerebral Infarction"[MeSH Terms]) AND ("Posterior Cerebral Artery"[MeSH Terms] OR "Proximal posterior Cerebral Artery"[All Fields] OR "infarction, posterior cerebral artery"[MeSH Terms] OR "Posterior cerebral artery occlusion"[All Fields] OR "Posterior cerebral artery stroke"[All Fields] OR (("Posterior Cerebral Artery"[MeSH Terms] OR ("posterior"[All Fields] AND "cerebral"[All Fields] AND "artery"[All Fields]) OR "Posterior Cerebral Artery"[All Fields]) AND ("dental occlusion"[MeSH Terms] OR ("dental"[All Fields] AND "occlusion"[All Fields]) OR "dental occlusion"[All Fields] OR "occlusion"[All Fields] OR "occlused"[All Fields] OR "occlusions"[All Fields] OR "occlusive"[All Fields] OR "occlusives"[All Fields]) AND ("stroke"[MeSH Terms] OR "stroke"[All Fields] OR "strokes"[All Fields] OR "stroke s"[All Fields])) OR "Isolated posterior cerebral artery occlusion"[All Fields] OR "MeVO"[All Fields] OR "MDVO"[All Fields] OR "PCA"[All Fields] OR "p1"[All Fields] OR "p2"[All Fields] OR "p3"[All Fields]) AND ("Embolectomy"[All Fields] OR "Thrombectomy"[MeSH Terms] OR "Endovascular thrombectomy"[All Fields] OR "medium vessel occlusion"[All Fields] OR "mechanical thrombectomy"[All Fields] OR "endovascular procedure"[All Fields] OR "endovascular therapy"[All Fields]) | 174 |
| **Cochrane Central** | ("Ischemic Stroke" OR "Cerebral Infarction") AND ("Posterior Cerebral Artery" OR "Proximal posterior Cerebral Artery" OR "Infarction, Posterior Cerebral Artery" OR "Posterior cerebral artery occlusion" OR "Posterior cerebral artery stroke" OR "Posterior cerebral artery occlusion Stroke" OR "Isolated posterior cerebral artery occlusion" OR "MeVO" OR "MDVO" OR "PCA" OR "p1" OR "p2" OR "p3") AND ("Embolectomy" OR "Thrombectomy" OR "Endovascular thrombectomy" OR "medium vessel occlusion" OR "mechanical thrombectomy" OR "endovascular procedure" OR "endovascular therapy" ) | 43 |
| **ScienceDirect** | ("Ischemic Stroke") AND ("Posterior Cerebral Artery" OR "Infarction, Posterior Cerebral Artery" OR "Posterior cerebral artery occlusion" OR "PCA") AND ("Embolectomy" OR "Endovascular thrombectomy" OR "mechanical thrombectomy" ) | 864 |

| **Supplementary Table S2:** Newcastle Ottawa Scale for the quality assessment of the non-randomized cohort studies | | | | | | | | | | |
| --- | --- | --- | --- | --- | --- | --- | --- | --- | --- | --- |
| **Cohort Studies** | | **Selection** | | | | **Comparability** | **Exposure** | | | **Total** |
| ***Author*** | ***Year*** | ***Representativeness of Exposed Cohort*** | ***Selection of the Non exposed cohort*** | ***Ascertainment of Exposure*** | ***Outcome was not Present at the start of Study*** | ***Assessment of Outcome*** | ***Follow-up long enough for Outcomes to occur*** | ***Adequacy of follow-up of Cohorts*** |
| Cunha | 2021 | * | * | * |  | ** | * | * |  | 7 |
| Herweh | 2021 | * | * | * | * | * | * | * |  | 7 |
| Maulucci | 2023 | * | * | * | * | ** | * | * | * | 9 |
| Nguyen | 2023 | * | * | * | * | ** | * | * | * | 9 |
| Sabben | 2023 | * | * | * | * | * | * | * |  | 7 |
| Strambo | 2020 | * | * | * | * | * | * | * | * | 8 |
| Salim | 2024 | * | * | * | * | ** | * | * | * | 9 |
| Strambo | 2024 | * | * | * | * | * | * | * | * | 8 |
| Dicpinigaitis | 2024 | * | * | * | * | ** | * | * | * | 9 |

| **Supplementary Table S3:** Newcastle Ottawa Scale for the quality assessment of the non-randomized case-control studies | | | | | | | | | | |
| --- | --- | --- | --- | --- | --- | --- | --- | --- | --- | --- |
| **Study ID** | **Case Definition Adequate?** | **Representativeness of the Cases** | **Selection of Controls** | **Definition of Controls** | **Control for Demographics (eg. Age, Sex, BMI, etc.)** | **Control for Other Confounding Factors** | **Ascertainment of Exposure** | **Same Method of Ascertainment for Cases and Controls** | **Non-Response Rate** | **Overall** |
| **Meyer 2021** | ***** | ***** | ***** | ***** | ***** | ***** | ***** | ***** |  | **8** |

**
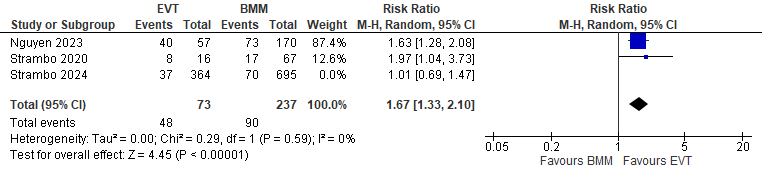
**

**Supplementary Figure 1:** Visual field normalization leave-out-out sensitivity analysis


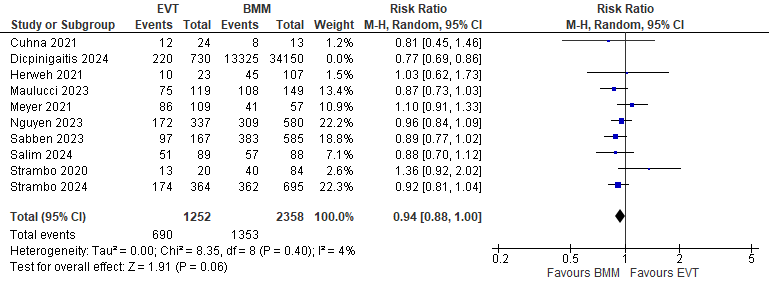


**Supplementary Figure 2:** Good functional outcome leave-out-out sensitivity analysis

**
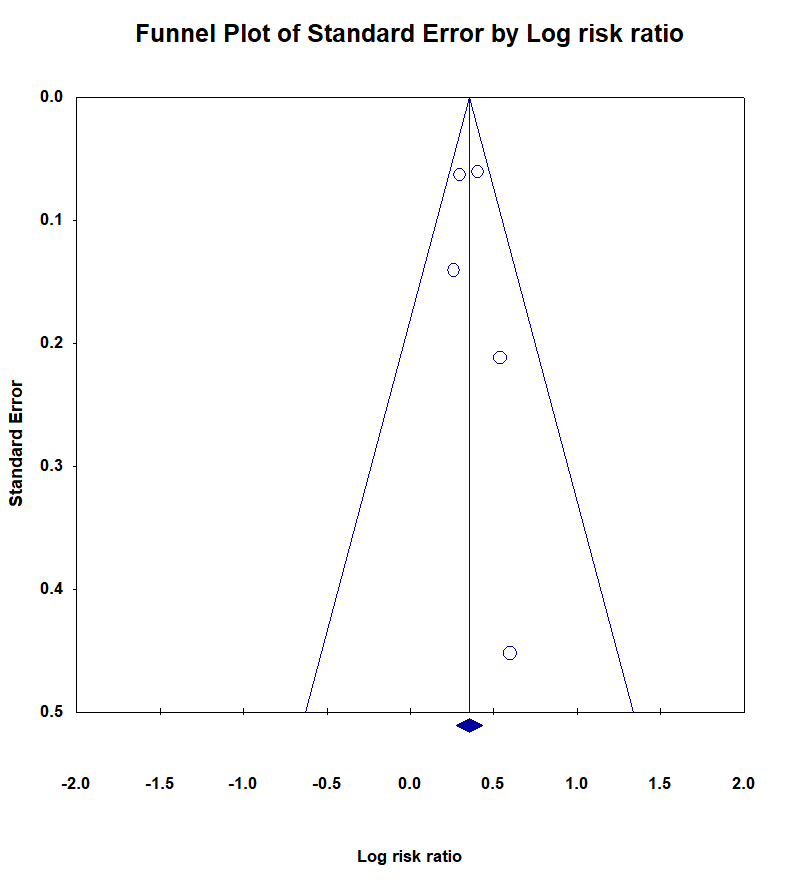
**

**Supplementary Figure 3:** Early neurological improvement funnel plot

**
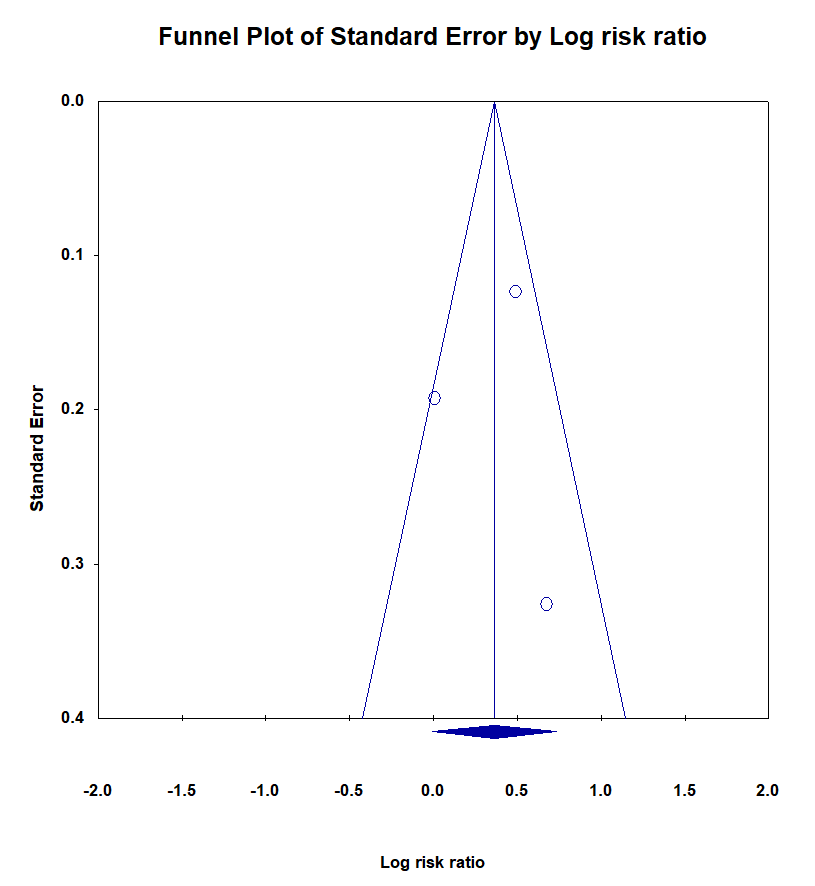
**

**Supplementary Figure 4:** Visual field normalization funnel plot

**
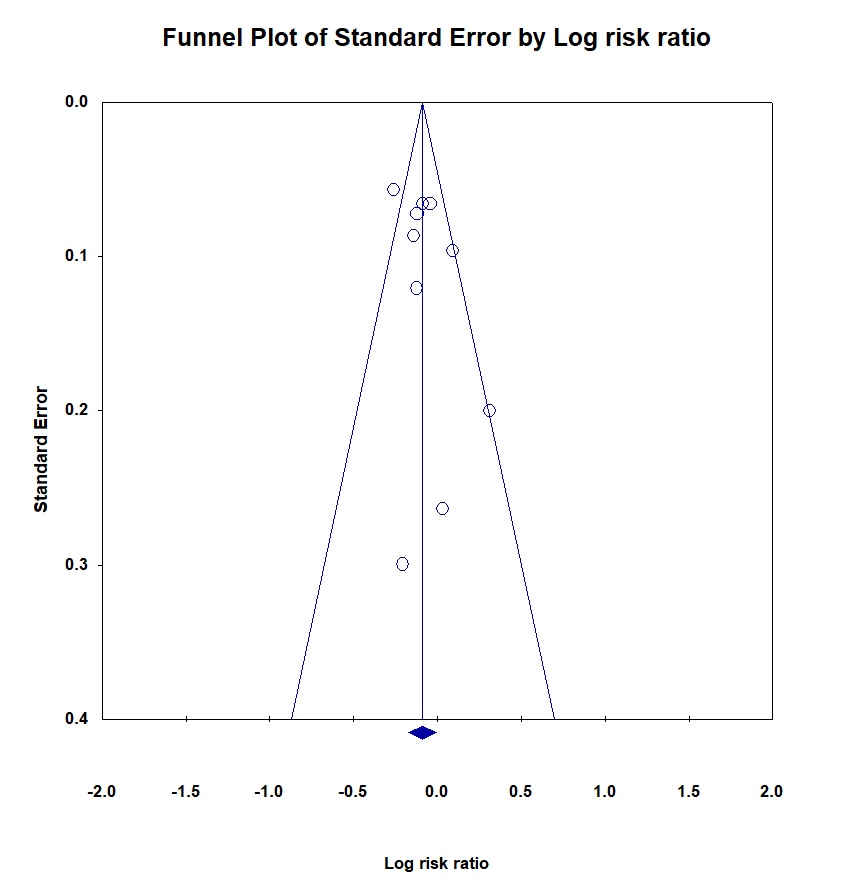
**

**Supplementary Figure 5:** Good functional outcome funnel plot

**
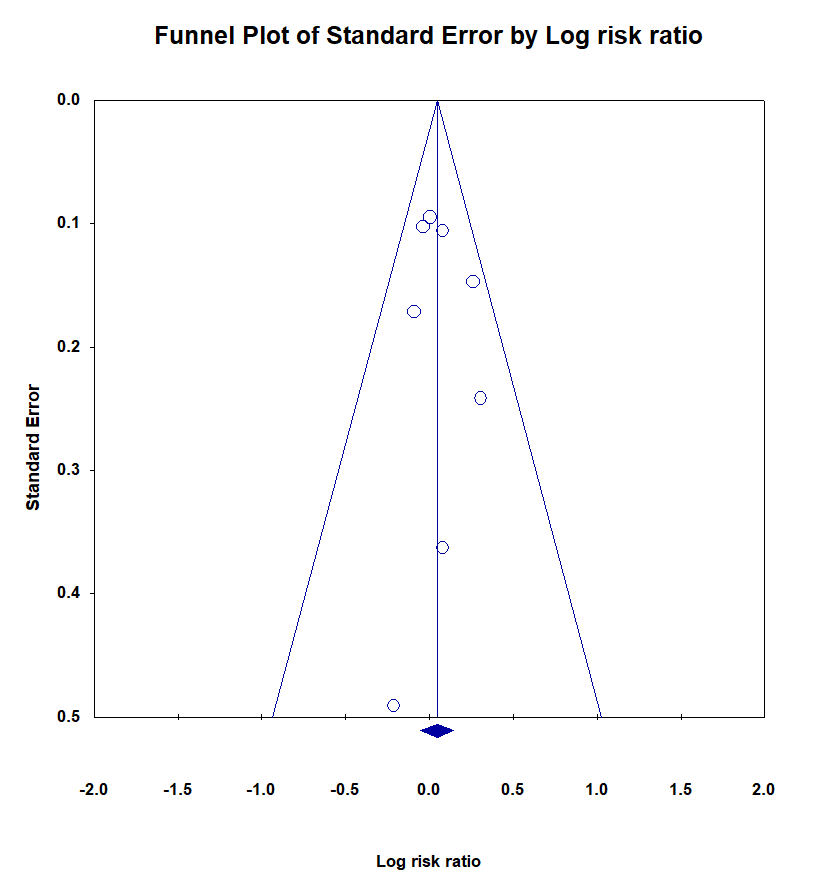
**

**Supplementary Figure 6:** Excellent functional outcome funnel plot

**
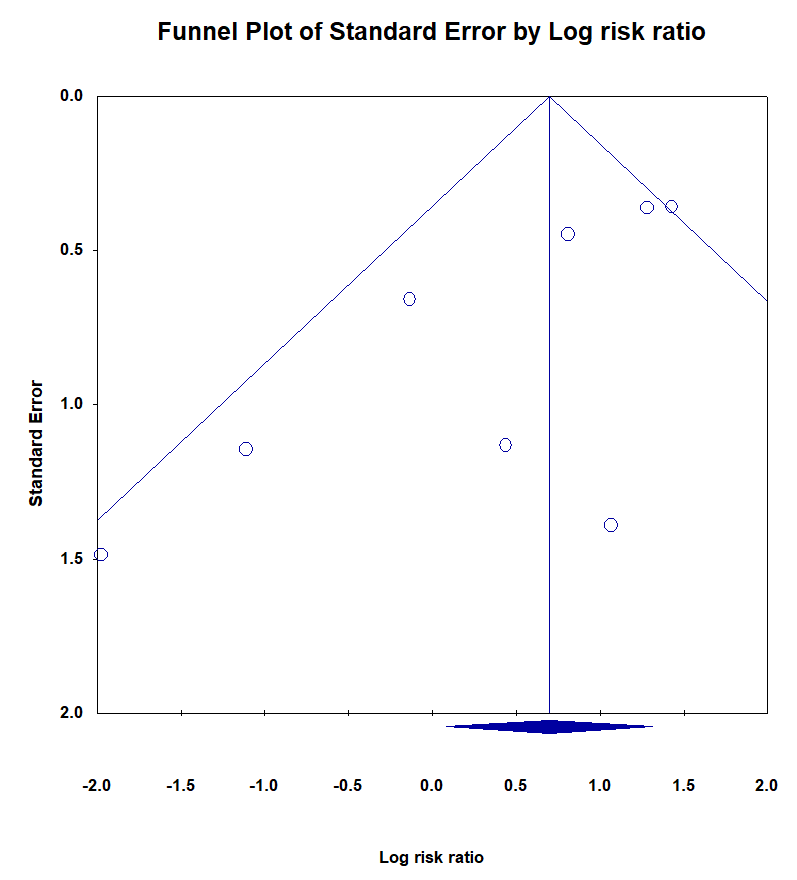
**

**Supplementary Figure 7:** Symptomatic intracranial hemorrhage funnel plot

**
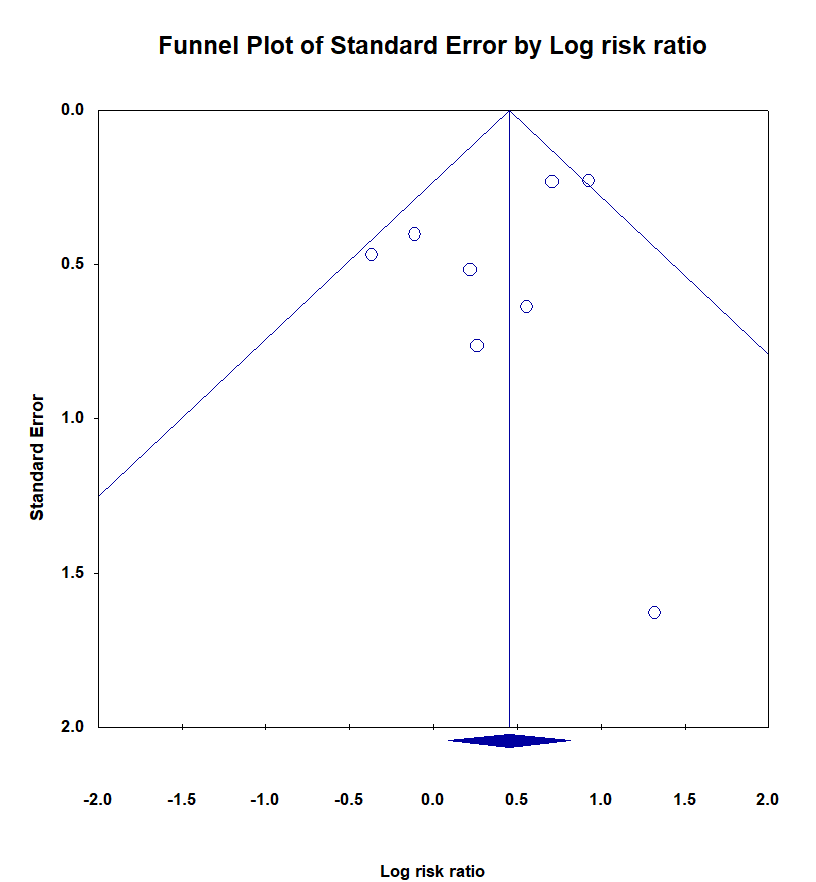
**

**Supplementary Figure 8:** Mortality at 90 days funnel plot

**
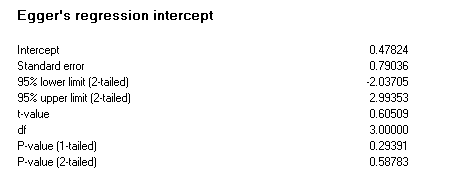
**

**Supplementary Figure 9:** Early neurological improvement, Egger's regression test

**
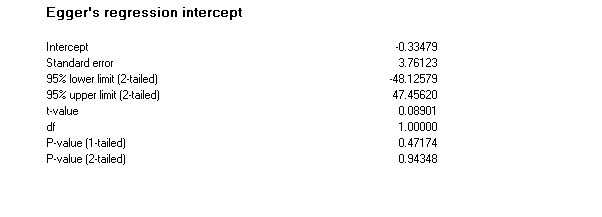
**

**Supplementary Figure 10:** Visual field normalization, Egger's regression test

**
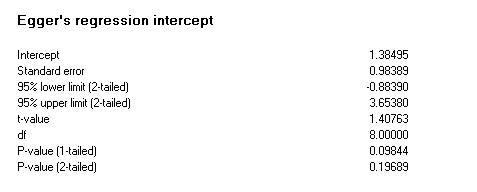
**

**Supplementary Figure 11:** Good functional outcome, Egger's regression test

**
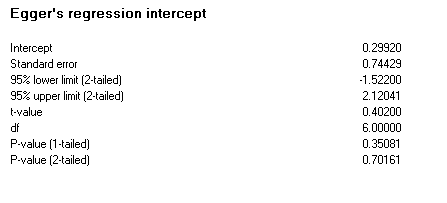
**

**Supplementary Figure 12:** Excellent functional outcome, Egger's regression test

**
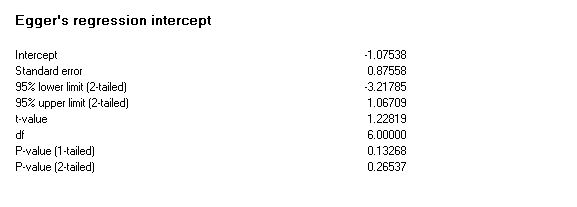
**

**Supplementary Figure 13:** Mortality at 90 days, Egger's regression test

**
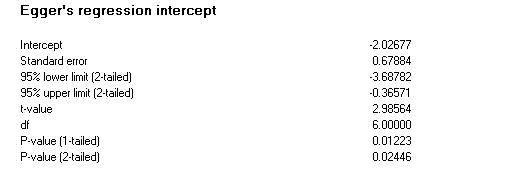
**

**Supplementary Figure 14:** Symptomatic intracranial hemorrhage, Egger's regression test

**
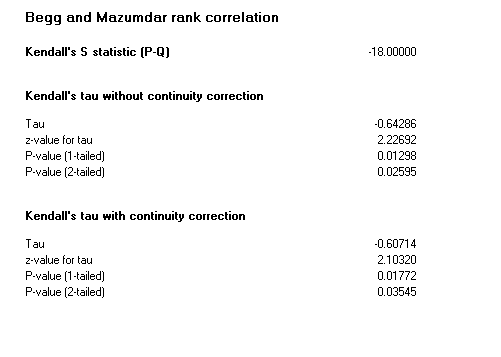
**

**Supplementary Figure 15:** Symptomatic intracranial hemorrhage, Begg's rank correlation test
